# Supplementary material
Source: Springer Nature journal article supplement (https://www.springermedizin.de/resource/supplementary/12879_2008_791_MOESM1_ESM.pdf/9449790)

34 patients treated  
with colistin

143 patients treated with  
tobramycin

2 patients excluded  
because they were  
treated with both  
antimicrobials

every fourth patient in  
chronological order of  
date of admission  
was included

32 patients  
included in the  
analysis

32 patients  
included in the  
analysis

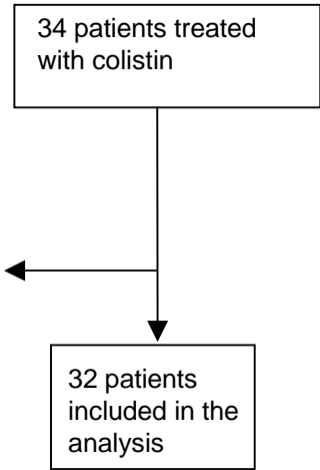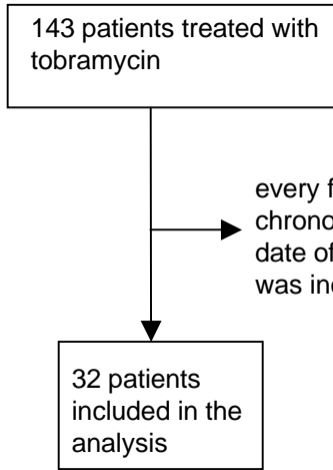

Supplement: MOESM1 [file 9449790]
